# Supplementary material for: A versatile fluorescence sensor for DNA detection based on layered double hydroxides and exonuclease III
Source: Royal Society of Chemistry journal article supplement (doi:10.1039/d3nj02082g), 2023-01-01
Supplement: d3nj02082g1.pdf [file d3nj02082g1.pdf]

## Electronic Supplementary Information

### A versatile fluorescence sensor for DNA detection based on layered double hydroxides and exonuclease III

Yuanyi Wu,<sup>†a</sup> Shihan Liu,<sup>†a</sup> Yumei Xiao,<sup>a</sup> Qian Li,<sup>a</sup> Qin Xiang,<sup>a</sup> Xianqin Song,<sup>a</sup> Shanglin Wu,<sup>a</sup> Kaiyong Wang<sup>\*b</sup> and Yi Yang<sup>\*ac</sup>

<sup>a</sup> School of Public Health, Southwest Medical University, Luzhou 646000, China

<sup>b</sup> Southwest Medical University, Luzhou 646000, China

<sup>c</sup> Environmental Health Effects and Risk Assessment Key Laboratory of Luzhou, School of Public Health, Southwest Medical University, Luzhou 646000, China

<sup>†</sup> These authors contributed equally to this work.

**\*Correspondence:** Kaiyong Wang, E-mail: wangkaiyong@swmu.edu.cn; Yi Yang, E-mail: yangyipz@126.com.

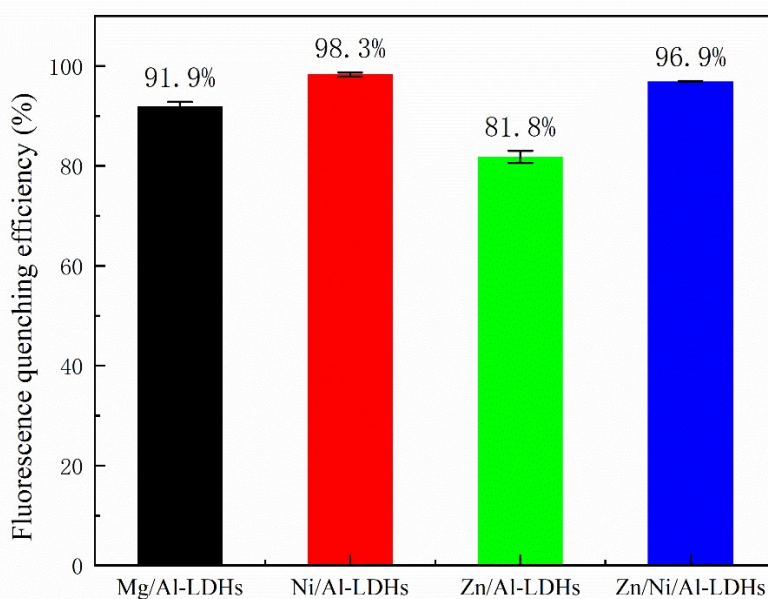

**Fig. S1** Fluorescence quenching efficiencies of different types of LDHs on 20 nM P (P, 20 nM; LDHs, 0.2 mg/mL; adsorption time, 10 min; centrifugal time, 1 min).

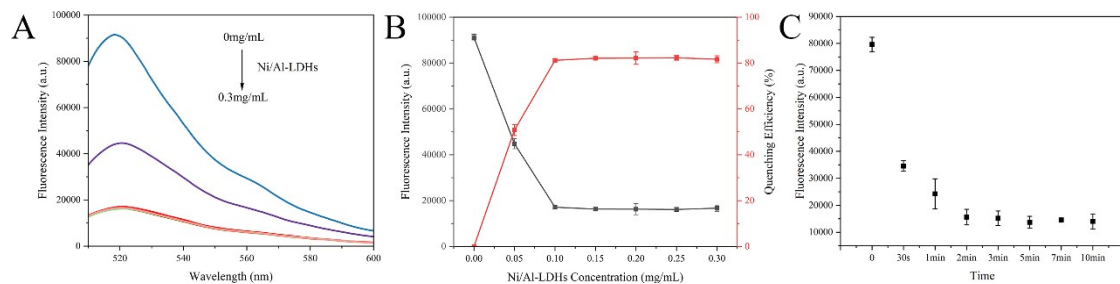

**Fig. S2 (a)** The fluorescence spectra of 20 nM P on different concentrations of Ni/Al-LDHs (Ni/Al-LDHs, 0.00, 0.05, 0.10, 0.15, 0.20, 0.25, 0.30 mg/mL; T, 20nM; Exo III, 20U; enzyme digestion time, 30 min; adsorption time, 10 min). **(b)** The fluorescence quenching ability of different concentrations of Ni/Al-LDHs on 20 nM P (Ni/Al-LDHs, 0.00, 0.05, 0.10, 0.15, 0.20, 0.25, 0.30 mg/mL; T, 20nM; Exo III, 20U; enzyme digestion time, 30 min; adsorption time, 10 min). **(c)** The effect of adsorption time on the fluorescence quenching (P, 20 nM; T, 20nM; Ni/Al-LDHs, 0.1 mg/mL; Exo III, 20U; enzyme digestion time, 30 min; adsorption time, 0~10 min).

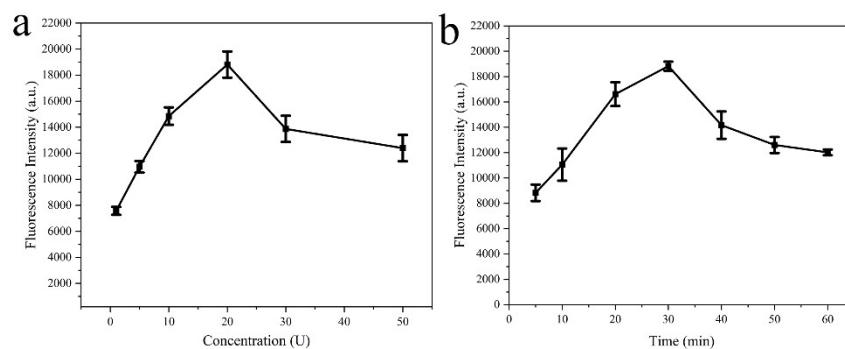

**Fig. S3 (a)** The effect of different concentrations of Exo III on the measured fluorescence intensities (P, 20 nM; T, 20 nM; Ni/Al-LDHs, 0.1 mg/mL; adsorption time, 2 min; enzyme digestion time, 30 min; Exo III concentration, 0-50 U). **(b)** The effect of enzyme digestion time on the measured fluorescence intensity (P, 20 nM; T, 20 nM; Ni/Al-LDHs, 0.1 mg/mL; adsorption time, 2 min; Exo III concentration, 20 U; enzyme digestion time, 5-60 min).
